# Supplementary material for: The effects of Lacticaseibacillus rhamnosus GG supplementation on gastrointestinal and respiratory outcomes: a systematic review and meta-analysis of randomized controlled trials
Source: Royal Society of Chemistry journal article supplement (doi:10.1039/d5fo01780g), 2025-01-01
Supplement: d5fo01780g1.pdf [file d5fo01780g1.pdf]

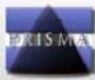

PRISMA 2020 Checklist

| Section and Topic       | Item # | Checklist item                                                                                                                                                                                                                                                                                       | Location where item is reported (page, unless specifically mentioned otherwise)                                                                                |
|-------------------------|--------|------------------------------------------------------------------------------------------------------------------------------------------------------------------------------------------------------------------------------------------------------------------------------------------------------|----------------------------------------------------------------------------------------------------------------------------------------------------------------|
| <b>TITLE</b>            |        |                                                                                                                                                                                                                                                                                                      |                                                                                                                                                                |
| Title                   | 1      | Identify the report as a systematic review.                                                                                                                                                                                                                                                          | 1                                                                                                                                                              |
| <b>ABSTRACT</b>         |        |                                                                                                                                                                                                                                                                                                      |                                                                                                                                                                |
| Abstract                | 2      | See the PRISMA 2020 for Abstracts checklist.                                                                                                                                                                                                                                                         | 2,3                                                                                                                                                            |
| <b>INTRODUCTION</b>     |        |                                                                                                                                                                                                                                                                                                      |                                                                                                                                                                |
| Rationale               | 3      | Describe the rationale for the review in the context of existing knowledge.                                                                                                                                                                                                                          | 4,5                                                                                                                                                            |
| Objectives              | 4      | Provide an explicit statement of the objective(s) or question(s) the review addresses.                                                                                                                                                                                                               | 5,6                                                                                                                                                            |
| <b>METHODS</b>          |        |                                                                                                                                                                                                                                                                                                      |                                                                                                                                                                |
| Eligibility criteria    | 5      | Specify the inclusion and exclusion criteria for the review and how studies were grouped for the syntheses.                                                                                                                                                                                          | Briefly mentioned in page 7, summarized in Table 1, detailed in supplement (page 1)                                                                            |
| Information sources     | 6      | Specify all databases, registers, websites, organisations, reference lists and other sources searched or consulted to identify studies. Specify the date when each source was last searched or consulted.                                                                                            | 7 (Literature Search)                                                                                                                                          |
| Search strategy         | 7      | Present the full search strategies for all databases, registers and websites, including any filters and limits used.                                                                                                                                                                                 | Supplementary Table 1                                                                                                                                          |
| Selection process       | 8      | Specify the methods used to decide whether a study met the inclusion criteria of the review, including how many reviewers screened each record and each report retrieved, whether they worked independently, and if applicable, details of automation tools used in the process.                     | Briefly mentioned in page 7 (Methods; Study Selection and Data Extraction)                                                                                     |
| Data collection process | 9      | Specify the methods used to collect data from reports, including how many reviewers collected data from each report, whether they worked independently, any processes for obtaining or confirming data from study investigators, and if applicable, details of automation tools used in the process. | Reviewers involved in data extraction are briefly mentioned on page 7 (Methods), and the tool used for data extraction is detailed in the supplement (page 1). |
| Data items              | 10a    | List and define all outcomes for which data were sought. Specify whether all results that were compatible with each outcome domain in each                                                                                                                                                           | Outcome definitions are                                                                                                                                        |

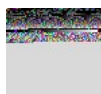

## PRISMA 2020 Checklist

| Section and Topic             | Item # | Checklist item                                                                                                                                                                                                                                                    | Location where item is reported (page, unless specifically mentioned otherwise)                                                                                   |
|-------------------------------|--------|-------------------------------------------------------------------------------------------------------------------------------------------------------------------------------------------------------------------------------------------------------------------|-------------------------------------------------------------------------------------------------------------------------------------------------------------------|
|                               |        | study were sought (e.g. for all measures, time points, analyses), and if not, the methods used to decide which results to collect.                                                                                                                                | provided in the supplement (page 1), while required outcome measures and methods for obtaining unreported measures are detailed on page 8 (Statistical Analyses). |
|                               | 10b    | List and define all other variables for which data were sought (e.g. participant and intervention characteristics, funding sources). Describe any assumptions made about any missing or unclear information.                                                      | Supplement page 1                                                                                                                                                 |
| Study risk of bias assessment | 11     | Specify the methods used to assess risk of bias in the included studies, including details of the tool(s) used, how many reviewers assessed each study and whether they worked independently, and if applicable, details of automation tools used in the process. | Briefly mentioned on page 7 (Assessments of Rob and the certainty of evidence), and detailed in the supplement (page 1).                                          |
| Effect measures               | 12     | Specify for each outcome the effect measure(s) (e.g. risk ratio, mean difference) used in the synthesis or presentation of results.                                                                                                                               | 8 (Statistical Analyses)                                                                                                                                          |
| Synthesis methods             | 13a    | Describe the processes used to decide which studies were eligible for each synthesis (e.g. tabulating the study intervention characteristics and comparing against the planned groups for each synthesis (item #5)).                                              | 6,7                                                                                                                                                               |
|                               | 13b    | Describe any methods required to prepare the data for presentation or synthesis, such as handling of missing summary statistics, or data conversions.                                                                                                             | 8 (Statistical Analyses)                                                                                                                                          |
|                               | 13c    | Describe any methods used to tabulate or visually display results of individual studies and syntheses.                                                                                                                                                            | 8 (Statistical Analyses)                                                                                                                                          |
|                               | 13d    | Describe any methods used to synthesize results and provide a rationale for the choice(s). If meta-analysis was performed, describe the model(s), method(s) to identify the presence and extent of statistical heterogeneity, and software package(s) used.       | 8,9 (Statistical Analyses)                                                                                                                                        |
|                               | 13e    | Describe any methods used to explore possible causes of heterogeneity among study results (e.g. subgroup analysis, meta-regression).                                                                                                                              | 8 (Statistical Analyses)                                                                                                                                          |
|                               | 13f    | Describe any sensitivity analyses conducted to assess robustness of the synthesized results.                                                                                                                                                                      | 8 (Statistical Analyses)                                                                                                                                          |

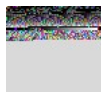

## PRISMA 2020 Checklist

| Section and Topic         | Item # | Checklist item                                                                                                                                                                               | Location where item is reported (page, unless specifically mentioned otherwise)                                          |
|---------------------------|--------|----------------------------------------------------------------------------------------------------------------------------------------------------------------------------------------------|--------------------------------------------------------------------------------------------------------------------------|
| Reporting bias assessment | 14     | Describe any methods used to assess risk of bias due to missing results in a synthesis (arising from reporting biases).                                                                      | Briefly mentioned on page 7 (Assessments of Rob and the certainty of evidence), and detailed in the supplement (page 1). |
| Certainty assessment      | 15     | Describe any methods used to assess certainty (or confidence) in the body of evidence for an outcome.                                                                                        | Briefly mentioned on page 7 (Assessments of Rob and the certainty of evidence), and detailed in the supplement (page 1). |
| <b>RESULTS</b>            |        |                                                                                                                                                                                              |                                                                                                                          |
| Study selection           | 16a    | Describe the results of the search and selection process, from the number of records identified in the search to the number of studies included in the review, ideally using a flow diagram. | 10 (Literature Search), Supplementary Figure 1                                                                           |
|                           | 16b    | Cite studies that might appear to meet the inclusion criteria, but which were excluded, and explain why they were excluded.                                                                  | Briefly mentioned on page 7 (Literature Search), and cited in the supplement (pages 2-7)                                 |
| Study characteristics     | 17     | Cite each included study and present its characteristics.                                                                                                                                    | Studies are cited on page 10 (Gastrointestinal Outcomes) and page 15 (Respiratory Outcomes), with their                  |



## PRISMA 2020 Checklist

| Section and Topic             | Item # | Checklist item                                                                                                                                                                                                                                                                       | Location where item is reported (page, unless specifically mentioned otherwise)                        |
|-------------------------------|--------|--------------------------------------------------------------------------------------------------------------------------------------------------------------------------------------------------------------------------------------------------------------------------------------|--------------------------------------------------------------------------------------------------------|
|                               |        |                                                                                                                                                                                                                                                                                      | characteristics summarized in Supplementary Tables 2 and 7 and detailed in the supplement (pages 8,9). |
| Risk of bias in studies       | 18     | Present assessments of risk of bias for each included study.                                                                                                                                                                                                                         | The RoB assessment is reported in eTables 3 and 8 and detailed in the supplement (pages 9-10).         |
| Results of individual studies | 19     | For all outcomes, present, for each study: (a) summary statistics for each group (where appropriate) and (b) an effect estimate and its precision (e.g. confidence/credible interval), ideally using structured tables or plots.                                                     | Figure1; Supplementary Figures 2 and 6.                                                                |
| Results of syntheses          | 20a    | For each synthesis, briefly summarise the characteristics and risk of bias among contributing studies.                                                                                                                                                                               | Tables 2-4                                                                                             |
|                               | 20b    | Present results of all statistical syntheses conducted. If meta-analysis was done, present for each the summary estimate and its precision (e.g. confidence/credible interval) and measures of statistical heterogeneity. If comparing groups, describe the direction of the effect. | 13,18                                                                                                  |
|                               | 20c    | Present results of all investigations of possible causes of heterogeneity among study results.                                                                                                                                                                                       | Section: Subgroup, meta-regression, and sensitivity analysis, Tables 2-4                               |
|                               | 20d    | Present results of all sensitivity analyses conducted to assess the robustness of the synthesized results.                                                                                                                                                                           | Section: Subgroup, meta-regression, and sensitivity analysis, Supplementary Tables 4,6,9               |
| Reporting biases              | 21     | Present assessments of risk of bias due to missing results (arising from reporting biases) for each synthesis assessed.                                                                                                                                                              | Section: Publication bias; Supplementary Figures 3-5                                                   |
| Certainty of evidence         | 22     | Present assessments of certainty (or confidence) in the body of evidence for each outcome assessed.                                                                                                                                                                                  | Section: Certainty of the evidence;                                                                    |



## PRISMA 2020 Checklist

| Section and Topic                              | Item # | Checklist item                                                                                                                                                                                                                             | Location where item is reported (page, unless specifically mentioned otherwise) |
|------------------------------------------------|--------|--------------------------------------------------------------------------------------------------------------------------------------------------------------------------------------------------------------------------------------------|---------------------------------------------------------------------------------|
|                                                |        |                                                                                                                                                                                                                                            | Supplementary Table 5                                                           |
| <b>DISCUSSION</b>                              |        |                                                                                                                                                                                                                                            |                                                                                 |
| Discussion                                     | 23a    | Provide a general interpretation of the results in the context of other evidence.                                                                                                                                                          | 119                                                                             |
|                                                | 23b    | Discuss any limitations of the evidence included in the review.                                                                                                                                                                            | 28,29                                                                           |
|                                                | 23c    | Discuss any limitations of the review processes used.                                                                                                                                                                                      | 28,29                                                                           |
|                                                | 23d    | Discuss implications of the results for practice, policy, and future research.                                                                                                                                                             | 19-22                                                                           |
| <b>OTHER INFORMATION</b>                       |        |                                                                                                                                                                                                                                            |                                                                                 |
| Registration and protocol                      | 24a    | Provide registration information for the review, including register name and registration number, or state that the review was not registered.                                                                                             | 7                                                                               |
|                                                | 24b    | Indicate where the review protocol can be accessed, or state that a protocol was not prepared.                                                                                                                                             | 7                                                                               |
|                                                | 24c    | Describe and explain any amendments to information provided at registration or in the protocol.                                                                                                                                            | 7                                                                               |
| Support                                        | 25     | Describe sources of financial or non-financial support for the review, and the role of the funders or sponsors in the review.                                                                                                              | 30                                                                              |
| Competing interests                            | 26     | Declare any competing interests of review authors.                                                                                                                                                                                         | 30                                                                              |
| Availability of data, code and other materials | 27     | Report which of the following are publicly available and where they can be found: template data collection forms; data extracted from included studies; data used for all analyses; analytic code; any other materials used in the review. | NA                                                                              |

From: Page MJ, McKenzie JE, Bossuyt PM, Boutron I, Hoffmann TC, Mulrow CD, et al. The PRISMA 2020 statement: an updated guideline for reporting systematic reviews. BMJ 2021;372:n71. doi: 10.1136/bmj.n71

For more information, visit: <http://www.prisma-statement.org/>
